# Supplementary material
Source: publisher site journal article supplement (https://www.spandidos-publications.com/4509/downloadSupplementary)
Supplement: Supplementary file 2 [file downloadSupplementary]

## Sheet: Sheet1
			Table SI. Methionine restriction leads to functional enrichment analysis of deregulated genes in gastric cancer.
Entries	ID	Description	GeneRatio	BgRatio	pvalue	p.adjust		Entries	ID	Description	GeneRatio	BgRatio	P-value	p.adjust
BP	GO:0030198	extracellular matrix organization	30/527	395/18866	7.92605e-07	0.00178813		BP	GO:0006260	DNA replication	47/483	273/18866	1.60785e-25	6.39443e-22
BP	GO:0043062	extracellular structure organization	30/527	396/18866	8.35575e-07	0.00178813		BP	GO:0071103	DNA conformation change	45/483	355/18866	5.93625e-19	1.18042e-15
BP	GO:0009612	response to mechanical stimulus	20/527	209/18866	1.7827e-06	0.00254332		BP	GO:0006261	DNA-dependent DNA replication	29/483	151/18866	1.66204e-17	2.20331e-14
BP	GO:0071496	cellular response to external stimulus	25/527	326/18866	5.5568e-06	0.00594578		BP	GO:0010948	negative regulation of cell cycle process	42/483	359/18866	1.76055e-16	1.5535e-13
BP	GO:0032496	response to lipopolysaccharide	24/527	334/18866	2.5018e-05	0.0214154		BP	GO:1901990	regulation of mitotic cell cycle phase transition	47/483	448/18866	1.9531e-16	1.5535e-13
BP	GO:0007623	circadian rhythm	18/527	218/18866	4.32828e-05	0.0308751		BP	GO:0007059	chromosome segregation	40/483	334/18866	4.2412e-16	2.81121e-13
BP	GO:0048511	rhythmic process	22/527	305/18866	5.10438e-05	0.0312096		BP	GO:1901987	regulation of cell cycle phase transition	48/483	486/18866	9.97788e-16	5.66886e-13
BP	GO:0002237	response to molecule of bacterial origin	24/527	356/18866	6.90529e-05	0.0332758		BP	GO:0045930	negative regulation of mitotic cell cycle	39/483	341/18866	4.71905e-15	2.34596e-12
BP	GO:0031667	response to nutrient levels	29/527	473/18866	6.99726e-05	0.0332758		BP	GO:0000280	nuclear division	43/483	428/18866	1.86016e-14	8.21982e-12
BP	GO:0031668	cellular response to extracellular stimulus	19/527	253/18866	9.65057e-05	0.037717		BP	GO:0048285	organelle fission	45/483	476/18866	4.0754e-14	1.62079e-11
BP	GO:0007044	cell-substrate junction assembly	11/527	99/18866	9.97986e-05	0.037717		BP	GO:0071824	protein-DNA complex subunit organization	34/483	282/18866	6.05471e-14	2.18905e-11
BP	GO:0035994	response to muscle stretch	5/527	18/18866	0.000105749	0.037717		BP	GO:0140014	mitotic nuclear division	34/483	286/18866	9.16631e-14	3.03787e-11
BP	GO:0150115	cell-substrate junction organization	11/527	102/18866	0.000130845	0.0430783		BP	GO:0000819	sister chromatid segregation	28/483	196/18866	1.54309e-13	4.72067e-11
BP	GO:0031669	cellular response to nutrient levels	17/527	221/18866	0.000166579	0.0449948		BP	GO:0065004	protein-DNA complex assembly	31/483	243/18866	1.73285e-13	4.74796e-11
BP	GO:0007249	I-kappaB kinase/NF-kappaB signaling	20/527	286/18866	0.000168259	0.0449948		BP	GO:0032392	DNA geometric change	22/483	116/18866	1.79078e-13	4.74796e-11
BP	GO:0043588	skin development	26/527	425/18866	0.000170061	0.0449948		BP	GO:0098813	nuclear chromosome segregation	32/483	272/18866	6.68033e-13	1.66048e-10
BP	GO:0098703	calcium ion import across plasma membrane	5/527	20/18866	0.000182706	0.0449948		BP	GO:1902749	regulation of cell cycle G2/M phase transition	28/483	217/18866	1.99189e-12	4.65984e-10
BP	GO:0060326	cell chemotaxis	21/527	311/18866	0.000189231	0.0449948		BP	GO:1901991	negative regulation of mitotic cell cycle phase transition	30/483	251/18866	2.37196e-12	5.24071e-10
BP	GO:0007517	muscle organ development	25/527	407/18866	0.000212194	0.0477995		BP	GO:1901988	negative regulation of cell cycle phase transition	31/483	270/18866	2.95324e-12	6.1816e-10
CC	GO:0062023	collagen-containing extracellular matrix	30/532	427/19559	2.31248e-06	0.0010013		BP	GO:0044786	cell cycle DNA replication	16/483	65/18866	5.44427e-12	1.08259e-09
CC	GO:0005581	collagen trimer	10/532	87/19559	0.000124677	0.0212202		BP	GO:0033260	nuclear DNA replication	15/483	60/18866	1.98228e-11	3.68487e-09
CC	GO:0030016	myofibril	17/532	227/19559	0.000168288	0.0212202		BP	GO:0044839	cell cycle G2/M phase transition	30/483	273/18866	2.0384e-11	3.68487e-09
CC	GO:0001533	cornified envelope	7/532	45/19559	0.00019603	0.0212202		BP	GO:0000070	mitotic sister chromatid segregation	23/483	161/18866	2.36259e-11	4.08522e-09
CC	GO:0043292	contractile fiber	17/532	238/19559	0.000294579	0.0228431		BP	GO:0010965	regulation of mitotic sister chromatid separation	15/483	61/18866	2.56764e-11	4.25479e-09
CC	GO:0005788	endoplasmic reticulum lumen	20/532	308/19559	0.000316533	0.0228431		BP	GO:0032508	DNA duplex unwinding	19/483	108/18866	3.23877e-11	5.15223e-09
MF	GO:0005201	extracellular matrix structural constituent	19/537	169/18352	5.53551e-07	0.000395235		BP	GO:0033045	regulation of sister chromatid segregation	17/483	84/18866	3.47147e-11	5.31001e-09
MF	GO:0008330	protein tyrosine/threonine phosphatase activity	5/537	10/18352	4.69827e-06	0.00167728		BP	GO:0006310	DNA recombination	31/483	299/18866	4.20758e-11	6.19762e-09
MF	GO:0030020	extracellular matrix structural constituent conferring tensile strength	8/537	41/18352	2.08008e-05	0.0039812		BP	GO:0007093	mitotic cell cycle checkpoint	23/483	166/18866	4.46801e-11	6.34616e-09
MF	GO:0017017	MAP kinase tyrosine/serine/threonine phosphatase activity	5/537	13/18352	2.23037e-05	0.0039812		BP	GO:0051306	mitotic sister chromatid separation	15/483	64/18866	5.41128e-11	7.42092e-09
MF	GO:0033549	MAP kinase phosphatase activity	5/537	14/18352	3.38608e-05	0.00483532		BP	GO:0010389	regulation of G2/M transition of mitotic cell cycle	25/483	200/18866	6.23906e-11	8.27092e-09
KEGG	hsa04060	Cytokine-cytokine receptor interaction	18/151	295/8087	8.73807e-06	0.00200976		BP	GO:1905818	regulation of chromosome separation	15/483	66/18866	8.68588e-11	1.07949e-08
KEGG	hsa04061	Viral protein interaction with cytokine and cytokine receptor	9/151	100/8087	9.72677e-05	0.0111858		BP	GO:0006270	DNA replication initiation	12/483	39/18866	1.44527e-10	1.74177e-08
KEGG	hsa04657	IL-17 signaling pathway	8/151	94/8087	0.000351623	0.0269578		BP	GO:0007088	regulation of mitotic nuclear division	22/483	163/18866	1.99154e-10	2.32952e-08
KEGG	hsa00500	Starch and sucrose metabolism	5/151	36/8087	0.000501902	0.0288594		BP	GO:0051304	chromosome separation	17/483	94/18866	2.26026e-10	2.55678e-08
KEGG	hsa05167	Kaposi sarcoma-associated herpesvirus infection	11/151	193/8087	0.000941861	0.0433256		BP	GO:0051983	regulation of chromosome segregation	18/483	107/18866	2.31441e-10	2.55678e-08
								BP	GO:0031145	anaphase-promoting complex-dependent catabolic process	16/483	83/18866	2.84352e-10	3.0564e-08
								BP	GO:0033047	regulation of mitotic sister chromatid segregation	15/483	72/18866	3.24818e-10	3.39947e-08
								BP	GO:0045839	negative regulation of mitotic nuclear division	13/483	52/18866	4.41769e-10	4.42549e-08
								BP	GO:0000086	G2/M transition of mitotic cell cycle	27/483	254/18866	4.45109e-10	4.42549e-08
								BP	GO:0051783	regulation of nuclear division	23/483	188/18866	5.64613e-10	5.47674e-08
								BP	GO:0006323	DNA packaging	26/483	240/18866	6.23412e-10	5.90312e-08
								BP	GO:0034724	DNA replication-independent nucleosome organization	13/483	54/18866	7.35771e-10	6.80503e-08
								BP	GO:0030071	regulation of mitotic metaphase/anaphase transition	13/483	56/18866	1.19757e-09	1.08244e-07
								BP	GO:0007091	metaphase/anaphase transition of mitotic cell cycle	13/483	58/18866	1.90839e-09	1.64993e-07
								BP	GO:1902099	regulation of metaphase/anaphase transition of cell cycle	13/483	58/18866	1.90839e-09	1.64993e-07
								BP	GO:1902750	negative regulation of cell cycle G2/M phase transition	17/483	108/18866	2.12598e-09	1.79894e-07
								BP	GO:0010972	negative regulation of G2/M transition of mitotic cell cycle	16/483	96/18866	2.68253e-09	2.22259e-07
								BP	GO:1901989	positive regulation of cell cycle phase transition	17/483	110/18866	2.84217e-09	2.30679e-07
								BP	GO:0044784	metaphase/anaphase transition of cell cycle	13/483	60/18866	2.98226e-09	2.32558e-07
								BP	GO:0051784	negative regulation of nuclear division	13/483	60/18866	2.98226e-09	2.32558e-07
								BP	GO:0033044	regulation of chromosome organization	31/483	356/18866	3.18054e-09	2.4325e-07
								BP	GO:0006302	double-strand break repair	26/483	262/18866	4.09039e-09	3.06934e-07
								BP	GO:0006336	DNA replication-independent nucleosome assembly	12/483	53/18866	7.11983e-09	5.24362e-07
								BP	GO:0009124	nucleoside monophosphate biosynthetic process	11/483	44/18866	9.88776e-09	7.02208e-07
								BP	GO:0033046	negative regulation of sister chromatid segregation	11/483	44/18866	9.88776e-09	7.02208e-07
								BP	GO:0006333	chromatin assembly or disassembly	23/483	220/18866	1.21531e-08	8.47946e-07
								BP	GO:0051985	negative regulation of chromosome segregation	11/483	45/18866	1.27877e-08	8.76838e-07
								BP	GO:0034508	centromere complex assembly	12/483	56/18866	1.38988e-08	9.36874e-07
								BP	GO:1901992	positive regulation of mitotic cell cycle phase transition	15/483	94/18866	1.5593e-08	1.03356e-06
								BP	GO:0090068	positive regulation of cell cycle process	27/483	302/18866	1.93286e-08	1.26016e-06
								BP	GO:0031055	chromatin remodeling at centromere	11/483	47/18866	2.09508e-08	1.34389e-06
								BP	GO:0034502	protein localization to chromosome	14/483	85/18866	3.10596e-08	1.9607e-06
								BP	GO:0000723	telomere maintenance	19/483	161/18866	3.25142e-08	2.0151e-06
								BP	GO:0006401	RNA catabolic process	32/483	415/18866	3.29615e-08	2.0151e-06
								BP	GO:0044843	cell cycle G1/S phase transition	27/483	310/18866	3.34415e-08	2.0151e-06
								BP	GO:2000816	negative regulation of mitotic sister chromatid separation	10/483	39/18866	3.60041e-08	2.13714e-06
								BP	GO:1905819	negative regulation of chromosome separation	10/483	40/18866	4.69157e-08	2.74388e-06
								BP	GO:0072521	purine-containing compound metabolic process	34/483	472/18866	6.42481e-08	3.70311e-06
								BP	GO:0045333	cellular respiration	20/483	187/18866	7.48653e-08	4.25342e-06
								BP	GO:0033048	negative regulation of mitotic sister chromatid segregation	10/483	42/18866	7.77856e-08	4.35709e-06
								BP	GO:0000724	double-strand break repair via homologous recombination	17/483	138/18866	9.15256e-08	5.05552e-06
								BP	GO:0034080	CENP-A containing nucleosome assembly	10/483	43/18866	9.90572e-08	5.32365e-06
								BP	GO:0061641	CENP-A containing chromatin organization	10/483	43/18866	9.90572e-08	5.32365e-06
								BP	GO:0000082	G1/S transition of mitotic cell cycle	25/483	287/18866	1.0808e-07	5.73113e-06
								BP	GO:0000725	recombinational repair	17/483	140/18866	1.13238e-07	5.88745e-06
								BP	GO:0032200	telomere organization	19/483	174/18866	1.13989e-07	5.88745e-06
								BP	GO:0006402	mRNA catabolic process	29/483	376/18866	1.46209e-07	7.45478e-06
								BP	GO:0031497	chromatin assembly	20/483	195/18866	1.49812e-07	7.5418e-06
								BP	GO:0031570	DNA integrity checkpoint	18/483	161/18866	1.7174e-07	8.53762e-06
								BP	GO:0006334	nucleosome assembly	17/483	145/18866	1.89576e-07	9.30797e-06
								BP	GO:1901657	glycosyl compound metabolic process	16/483	129/18866	1.9881e-07	9.64227e-06
								BP	GO:0006520	cellular amino acid metabolic process	27/483	340/18866	2.21132e-07	1.05957e-05
								BP	GO:0015980	energy derivation by oxidation of organic compounds	24/483	278/18866	2.2951e-07	1.08662e-05
								BP	GO:0032201	telomere maintenance via semi-conservative replication	8/483	27/18866	2.52006e-07	1.16766e-05
								BP	GO:0034728	nucleosome organization	19/483	183/18866	2.53158e-07	1.16766e-05
								BP	GO:2001251	negative regulation of chromosome organization	17/483	148/18866	2.55435e-07	1.16766e-05
								BP	GO:0009123	nucleoside monophosphate metabolic process	12/483	72/18866	2.63809e-07	1.19224e-05
								BP	GO:1901532	regulation of hematopoietic progenitor cell differentiation	13/483	86/18866	2.74088e-07	1.22477e-05
								BP	GO:0045931	positive regulation of mitotic cell cycle	18/483	168/18866	3.26973e-07	1.44486e-05
								BP	GO:2000736	regulation of stem cell differentiation	15/483	118/18866	3.45859e-07	1.51152e-05
								BP	GO:0009116	nucleoside metabolic process	14/483	104/18866	4.17015e-07	1.80268e-05
								BP	GO:0072331	signal transduction by p53 class mediator	23/483	267/18866	4.26091e-07	1.80959e-05
								BP	GO:0072522	purine-containing compound biosynthetic process	20/483	208/18866	4.27712e-07	1.80959e-05
								BP	GO:0006163	purine nucleotide metabolic process	31/483	442/18866	4.43688e-07	1.85742e-05
								BP	GO:0002244	hematopoietic progenitor cell differentiation	18/483	172/18866	4.64991e-07	1.92632e-05
								BP	GO:1901293	nucleoside phosphate biosynthetic process	23/483	269/18866	4.86118e-07	1.99309e-05
								BP	GO:0046034	ATP metabolic process	25/483	311/18866	4.96556e-07	2.0151e-05
								BP	GO:0019693	ribose phosphate metabolic process	30/483	427/18866	6.57964e-07	2.64315e-05
								BP	GO:0044774	mitotic DNA integrity checkpoint	14/483	108/18866	6.67533e-07	2.65478e-05
								BP	GO:0006164	purine nucleotide biosynthetic process	19/483	197/18866	7.92921e-07	3.12222e-05
								BP	GO:0071459	protein localization to chromosome, centromeric region	7/483	22/18866	8.43466e-07	3.28869e-05
								BP	GO:0033238	regulation of cellular amine metabolic process	12/483	81/18866	9.85857e-07	3.80656e-05
								BP	GO:0006275	regulation of DNA replication	14/483	112/18866	1.04548e-06	3.99794e-05
								BP	GO:0042775	mitochondrial ATP synthesis coupled electron transport	13/483	97/18866	1.13645e-06	4.30443e-05
								BP	GO:0010639	negative regulation of organelle organization	29/483	416/18866	1.18555e-06	4.44803e-05
								BP	GO:0042773	ATP synthesis coupled electron transport	13/483	98/18866	1.28015e-06	4.75809e-05
								BP	GO:0044106	cellular amine metabolic process	15/483	131/18866	1.3467e-06	4.95911e-05
								BP	GO:0045787	positive regulation of cell cycle	28/483	396/18866	1.37488e-06	4.97785e-05
								BP	GO:0051984	positive regulation of chromosome segregation	8/483	33/18866	1.37682e-06	4.97785e-05
								BP	GO:0009165	nucleotide biosynthetic process	22/483	266/18866	1.50356e-06	5.38709e-05
								BP	GO:0007094	mitotic spindle assembly checkpoint	8/483	34/18866	1.76041e-06	6.08794e-05
								BP	GO:0031577	spindle checkpoint	8/483	34/18866	1.76041e-06	6.08794e-05
								BP	GO:0071173	spindle assembly checkpoint	8/483	34/18866	1.76041e-06	6.08794e-05
								BP	GO:0071174	mitotic spindle checkpoint	8/483	34/18866	1.76041e-06	6.08794e-05
								BP	GO:0009060	aerobic respiration	12/483	87/18866	2.1518e-06	7.31427e-05
								BP	GO:0060218	hematopoietic stem cell differentiation	12/483	87/18866	2.1518e-06	7.31427e-05
								BP	GO:0043486	histone exchange	10/483	59/18866	2.24957e-06	7.58182e-05
								BP	GO:1902036	regulation of hematopoietic stem cell differentiation	11/483	73/18866	2.34977e-06	7.85298e-05
								BP	GO:0051321	meiotic cell cycle	21/483	254/18866	2.6131e-06	8.66025e-05
								BP	GO:0045841	negative regulation of mitotic metaphase/anaphase transition	8/483	36/18866	2.80496e-06	9.21928e-05
								BP	GO:0051052	regulation of DNA metabolic process	26/483	365/18866	2.86445e-06	9.33764e-05
								BP	GO:0009308	amine metabolic process	15/483	140/18866	3.12516e-06	0.000101047
								BP	GO:1902100	negative regulation of metaphase/anaphase transition of cell cycle	8/483	37/18866	3.49919e-06	0.000111387
								BP	GO:0034404	nucleobase-containing small molecule biosynthetic process	13/483	107/18866	3.50098e-06	0.000111387
								BP	GO:0009259	ribonucleotide metabolic process	28/483	416/18866	3.56861e-06	0.000112638
								BP	GO:0006338	chromatin remodeling	19/483	218/18866	3.62137e-06	0.000113403
								BP	GO:0034501	protein localization to kinetochore	6/483	18/18866	3.90058e-06	0.000121192
								BP	GO:1901796	regulation of signal transduction by p53 class mediator	17/483	180/18866	4.00127e-06	0.000123357
								BP	GO:0006521	regulation of cellular amino acid metabolic process	10/483	63/18866	4.17595e-06	0.000126777
								BP	GO:0007062	sister chromatid cohesion	10/483	63/18866	4.17595e-06	0.000126777
								BP	GO:0042769	DNA damage response, detection of DNA damage	8/483	38/18866	4.3338e-06	0.000130572
								BP	GO:1902850	microtubule cytoskeleton organization involved in mitosis	15/483	144/18866	4.44139e-06	0.000132807
								BP	GO:0009150	purine ribonucleotide metabolic process	27/483	401/18866	5.29336e-06	0.000157102
								BP	GO:0022900	electron transport chain	17/483	184/18866	5.38651e-06	0.000158683
								BP	GO:0006271	DNA strand elongation involved in DNA replication	6/483	19/18866	5.57789e-06	0.000163112
								BP	GO:0043488	regulation of mRNA stability	17/483	186/18866	6.22905e-06	0.000180824
								BP	GO:0071456	cellular response to hypoxia	18/483	208/18866	7.18972e-06	0.0002072
								BP	GO:0090263	positive regulation of canonical Wnt signaling pathway	15/483	150/18866	7.34793e-06	0.00020741
								BP	GO:0000727	double-strand break repair via break-induced replication	5/483	12/18866	7.35349e-06	0.00020741
								BP	GO:0009162	deoxyribonucleoside monophosphate metabolic process	5/483	12/18866	7.35349e-06	0.00020741
								BP	GO:0000077	DNA damage checkpoint	15/483	151/18866	7.97011e-06	0.000223219
								BP	GO:0022904	respiratory electron transport chain	13/483	116/18866	8.6301e-06	0.000240013
								BP	GO:1903311	regulation of mRNA metabolic process	24/483	344/18866	9.77766e-06	0.00027004
								BP	GO:0044773	mitotic DNA damage checkpoint	12/483	101/18866	1.04634e-05	0.000286987
								BP	GO:0046390	ribose phosphate biosynthetic process	17/483	194/18866	1.09085e-05	0.000297145
								BP	GO:0043487	regulation of RNA stability	17/483	195/18866	1.16735e-05	0.000315819
								BP	GO:0036294	cellular response to decreased oxygen levels	18/483	218/18866	1.37182e-05	0.00036863
								BP	GO:0009127	purine nucleoside monophosphate biosynthetic process	6/483	22/18866	1.43688e-05	0.000383522
								BP	GO:0051054	positive regulation of DNA metabolic process	17/483	200/18866	1.62649e-05	0.000431236
								BP	GO:0019692	deoxyribose phosphate metabolic process	7/483	33/18866	1.65533e-05	0.000435976
								BP	GO:0043044	ATP-dependent chromatin remodeling	11/483	90/18866	1.85848e-05	0.000486263
								BP	GO:0006297	nucleotide-excision repair, DNA gap filling	6/483	23/18866	1.90216e-05	0.000494438
								BP	GO:0007051	spindle organization	16/483	183/18866	2.02722e-05	0.000519775
								BP	GO:0030177	positive regulation of Wnt signaling pathway	16/483	183/18866	2.02722e-05	0.000519775
								BP	GO:0009156	ribonucleoside monophosphate biosynthetic process	7/483	34/18866	2.03885e-05	0.000519775
								BP	GO:0002479	antigen processing and presentation of exogenous peptide antigen via MHC class I, TAP-dependent	10/483	75/18866	2.05916e-05	0.00052161
								BP	GO:0038061	NIK/NF-kappaB signaling	16/483	184/18866	2.16899e-05	0.000545954
								BP	GO:0043312	neutrophil degranulation	29/483	487/18866	2.46869e-05	0.000615762
								BP	GO:0006369	termination of RNA polymerase II transcription	7/483	35/18866	2.49278e-05	0.000615762
								BP	GO:0009262	deoxyribonucleotide metabolic process	7/483	35/18866	2.49278e-05	0.000615762
								BP	GO:0061418	regulation of transcription from RNA polymerase II promoter in response to hypoxia	10/483	77/18866	2.60354e-05	0.000639153
								BP	GO:0061013	regulation of mRNA catabolic process	17/483	208/18866	2.70045e-05	0.000658877
								BP	GO:0002283	neutrophil activation involved in immune response	29/483	490/18866	2.76221e-05	0.000669837
								BP	GO:0006119	oxidative phosphorylation	14/483	149/18866	2.98593e-05	0.0007197
								BP	GO:0042590	antigen processing and presentation of exogenous peptide antigen via MHC class I	10/483	80/18866	3.64936e-05	0.000871239
								BP	GO:0006413	translational initiation	16/483	192/18866	3.65846e-05	0.000871239
								BP	GO:0006098	pentose-phosphate shunt	5/483	16/18866	3.72525e-05	0.00087751
								BP	GO:0006090	pyruvate metabolic process	14/483	152/18866	3.72892e-05	0.00087751
								BP	GO:0071453	cellular response to oxygen levels	18/483	235/18866	3.75231e-05	0.00087782
								BP	GO:0009152	purine ribonucleotide biosynthetic process	15/483	173/18866	4.03232e-05	0.00093781
								BP	GO:0022616	DNA strand elongation	6/483	26/18866	4.0643e-05	0.000939751
								BP	GO:0071897	DNA biosynthetic process	16/483	196/18866	4.69739e-05	0.00107986
								BP	GO:0090329	regulation of DNA-dependent DNA replication	8/483	52/18866	4.87191e-05	0.00111354
								BP	GO:0007052	mitotic spindle organization	12/483	118/18866	5.05966e-05	0.00114984
								BP	GO:0006266	DNA ligation	5/483	17/18866	5.1667e-05	0.00115455
								BP	GO:0007096	regulation of exit from mitosis	5/483	17/18866	5.1667e-05	0.00115455
								BP	GO:0062012	regulation of small molecule metabolic process	27/483	456/18866	5.16747e-05	0.00115455
								BP	GO:0048863	stem cell differentiation	19/483	264/18866	5.38946e-05	0.00119742
								BP	GO:0006284	base-excision repair	7/483	40/18866	6.18796e-05	0.00136719
								BP	GO:2000573	positive regulation of DNA biosynthetic process	9/483	69/18866	6.35901e-05	0.0013915
								BP	GO:0061620	glycolytic process through glucose-6-phosphate	6/483	28/18866	6.36796e-05	0.0013915
								BP	GO:0070498	interleukin-1-mediated signaling pathway	11/483	103/18866	6.61273e-05	0.00143709
								BP	GO:0006740	NADPH regeneration	5/483	18/18866	7.00387e-05	0.00151382
								BP	GO:0036297	interstrand cross-link repair	8/483	55/18866	7.37082e-05	0.00158453
								BP	GO:0061615	glycolytic process through fructose-6-phosphate	6/483	29/18866	7.85678e-05	0.00167633
								BP	GO:0009113	purine nucleobase biosynthetic process	4/483	10/18866	7.88218e-05	0.00167633
								BP	GO:0019320	hexose catabolic process	8/483	56/18866	8.40916e-05	0.0017789
								BP	GO:0009260	ribonucleotide biosynthetic process	15/483	186/18866	9.23838e-05	0.00194397
								BP	GO:0006457	protein folding	17/483	230/18866	9.52292e-05	0.00199181
								BP	GO:0045840	positive regulation of mitotic nuclear division	8/483	57/18866	9.56587e-05	0.00199181
								BP	GO:0009168	purine ribonucleoside monophosphate biosynthetic process	5/483	20/18866	0.000121482	0.00251631
								BP	GO:0031146	SCF-dependent proteasomal ubiquitin-dependent protein catabolic process	10/483	93/18866	0.000133211	0.00274498
								BP	GO:0061077	chaperone-mediated protein folding	8/483	60/18866	0.000138519	0.00283964
								BP	GO:1903046	meiotic cell cycle process	15/483	193/18866	0.000139615	0.00284743
								BP	GO:1901976	regulation of cell cycle checkpoint	6/483	32/18866	0.000140444	0.00284972
								BP	GO:0051310	metaphase plate congression	8/483	61/18866	0.000155908	0.00312719
								BP	GO:0046386	deoxyribose phosphate catabolic process	5/483	21/18866	0.000156107	0.00312719
								BP	GO:0019080	viral gene expression	15/483	195/18866	0.000156477	0.00312719
								BP	GO:0035404	histone-serine phosphorylation	4/483	12/18866	0.000178362	0.00352176
								BP	GO:0007080	mitotic metaphase plate congression	7/483	47/18866	0.000178877	0.00352176
								BP	GO:0030261	chromosome condensation	7/483	47/18866	0.000178877	0.00352176
								BP	GO:0140013	meiotic nuclear division	14/483	177/18866	0.000192502	0.00377133
								BP	GO:0007063	regulation of sister chromatid cohesion	5/483	22/18866	0.000197795	0.0038164
								BP	GO:0010499	proteasomal ubiquitin-independent protein catabolic process	5/483	22/18866	0.000197795	0.0038164
								BP	GO:0062033	positive regulation of mitotic sister chromatid segregation	5/483	22/18866	0.000197795	0.0038164
								BP	GO:0006099	tricarboxylic acid cycle	6/483	34/18866	0.0001996	0.0038164
								BP	GO:0032212	positive regulation of telomere maintenance via telomerase	6/483	34/18866	0.0001996	0.0038164
								BP	GO:0060249	anatomical structure homeostasis	26/483	469/18866	0.000203718	0.00386625
								BP	GO:0019083	viral transcription	14/483	178/18866	0.000204152	0.00386625
								BP	GO:0002474	antigen processing and presentation of peptide antigen via MHC class I	10/483	99/18866	0.000224141	0.00422469
								BP	GO:0000083	regulation of transcription involved in G1/S transition of mitotic cell cycle	6/483	35/18866	0.00023574	0.00440158
								BP	GO:0009112	nucleobase metabolic process	6/483	35/18866	0.00023574	0.00440158
								BP	GO:0007127	meiosis I	11/483	119/18866	0.000242412	0.00450502
								BP	GO:0045842	positive regulation of mitotic metaphase/anaphase transition	4/483	13/18866	0.000252434	0.00464783
								BP	GO:1901970	positive regulation of mitotic sister chromatid separation	4/483	13/18866	0.000252434	0.00464783
								BP	GO:0046365	monosaccharide catabolic process	8/483	66/18866	0.000271995	0.0049849
								BP	GO:0009161	ribonucleoside monophosphate metabolic process	7/483	51/18866	0.000301537	0.00548553
								BP	GO:0009166	nucleotide catabolic process	8/483	67/18866	0.00030207	0.00548553
								BP	GO:0072527	pyrimidine-containing compound metabolic process	9/483	85/18866	0.000322097	0.00581879
								BP	GO:1904358	positive regulation of telomere maintenance via telomere lengthening	6/483	37/18866	0.000323348	0.00581879
								BP	GO:0006913	nucleocytoplasmic transport	21/483	354/18866	0.000337502	0.00597231
								BP	GO:0002218	activation of innate immune response	12/483	144/18866	0.000338012	0.00597231
								BP	GO:0045898	regulation of RNA polymerase II transcription preinitiation complex assembly	4/483	14/18866	0.000346282	0.00597231
								BP	GO:0090231	regulation of spindle checkpoint	4/483	14/18866	0.000346282	0.00597231
								BP	GO:0090266	regulation of mitotic cell cycle spindle assembly checkpoint	4/483	14/18866	0.000346282	0.00597231
								BP	GO:1901569	fatty acid derivative catabolic process	4/483	14/18866	0.000346282	0.00597231
								BP	GO:1902101	positive regulation of metaphase/anaphase transition of cell cycle	4/483	14/18866	0.000346282	0.00597231
								BP	GO:1903504	regulation of mitotic spindle checkpoint	4/483	14/18866	0.000346282	0.00597231
								BP	GO:0051101	regulation of DNA binding	11/483	124/18866	0.000346895	0.00597231
								BP	GO:0061982	meiosis I cell cycle process	11/483	124/18866	0.000346895	0.00597231
								BP	GO:0007098	centrosome cycle	11/483	125/18866	0.000371788	0.00637328
								BP	GO:0051169	nuclear transport	21/483	357/18866	0.000377474	0.00644298
								BP	GO:0006575	cellular modified amino acid metabolic process	14/483	190/18866	0.000398823	0.00677828
								BP	GO:0001666	response to hypoxia	21/483	359/18866	0.000406366	0.0068771
								BP	GO:0009163	nucleoside biosynthetic process	6/483	39/18866	0.000434598	0.00732372
								BP	GO:0051785	positive regulation of nuclear division	8/483	71/18866	0.000450746	0.00755909
								BP	GO:0051156	glucose 6-phosphate metabolic process	5/483	26/18866	0.000454071	0.00755909
								BP	GO:0060071	Wnt signaling pathway, planar cell polarity pathway	10/483	108/18866	0.000454268	0.00755909
								BP	GO:0006122	mitochondrial electron transport, ubiquinol to cytochrome c	4/483	15/18866	0.00046269	0.0076038
								BP	GO:1904874	positive regulation of telomerase RNA localization to Cajal body	4/483	15/18866	0.00046269	0.0076038
								BP	GO:1905820	positive regulation of chromosome separation	4/483	15/18866	0.00046269	0.0076038
								BP	GO:0051170	import into nucleus	13/483	171/18866	0.00047309	0.00774272
								BP	GO:0090305	nucleic acid phosphodiester bond hydrolysis	19/483	313/18866	0.000482522	0.00786472
								BP	GO:0043618	regulation of transcription from RNA polymerase II promoter in response to stress	10/483	109/18866	0.000488953	0.00790474
								BP	GO:2000278	regulation of DNA biosynthetic process	10/483	109/18866	0.000488953	0.00790474
								BP	GO:0009126	purine nucleoside monophosphate metabolic process	6/483	40/18866	0.000500372	0.00799189
								BP	GO:0016572	histone phosphorylation	6/483	40/18866	0.000500372	0.00799189
								BP	GO:0045740	positive regulation of DNA replication	6/483	40/18866	0.000500372	0.00799189
								BP	GO:1903706	regulation of hemopoiesis	26/483	498/18866	0.000509651	0.00810753
								BP	GO:0090175	regulation of establishment of planar polarity	10/483	110/18866	0.000525806	0.0083312
								BP	GO:0033209	tumor necrosis factor-mediated signaling pathway	13/483	173/18866	0.000528454	0.00833993
								BP	GO:1901292	nucleoside phosphate catabolic process	8/483	73/18866	0.000544722	0.00847673
								BP	GO:0006735	NADH regeneration	5/483	27/18866	0.000545648	0.00847673
								BP	GO:0061621	canonical glycolysis	5/483	27/18866	0.000545648	0.00847673
								BP	GO:0061718	glucose catabolic process to pyruvate	5/483	27/18866	0.000545648	0.00847673
								BP	GO:0042273	ribosomal large subunit biogenesis	8/483	74/18866	0.000597322	0.00924338
								BP	GO:0009263	deoxyribonucleotide biosynthetic process	4/483	16/18866	0.000604503	0.00928227
								BP	GO:0043174	nucleoside salvage	4/483	16/18866	0.000604503	0.00928227
								BP	GO:0036293	response to decreased oxygen levels	21/483	371/18866	0.000623701	0.00954023
								BP	GO:0045132	meiotic chromosome segregation	9/483	93/18866	0.000628634	0.00957884
								BP	GO:0010458	exit from mitosis	5/483	28/18866	0.000650424	0.00980419
								BP	GO:0002223	stimulatory C-type lectin receptor signaling pathway	10/483	113/18866	0.000650426	0.00980419
								BP	GO:0006353	DNA-templated transcription, termination	8/483	75/18866	0.000653948	0.00980419
								BP	GO:0044282	small molecule catabolic process	24/483	452/18866	0.000654566	0.00980419
								BP	GO:0002478	antigen processing and presentation of exogenous peptide antigen	13/483	177/18866	0.000655749	0.00980419
								BP	GO:0022613	ribonucleoprotein complex biogenesis	25/483	482/18866	0.000713426	0.0106266
								BP	GO:1901659	glycosyl compound biosynthetic process	6/483	43/18866	0.000744943	0.0109526
								BP	GO:0006096	glycolytic process	10/483	115/18866	0.000746329	0.0109526
								BP	GO:0043620	regulation of DNA-templated transcription in response to stress	10/483	115/18866	0.000746329	0.0109526
								BP	GO:0051225	spindle assembly	10/483	115/18866	0.000746329	0.0109526
								BP	GO:0031023	microtubule organizing center organization	11/483	136/18866	0.000759787	0.0111091
								BP	GO:0000076	DNA replication checkpoint	4/483	17/18866	0.000774606	0.0112843
								BP	GO:0002220	innate immune response activating cell surface receptor signaling pathway	10/483	116/18866	0.000798477	0.0115474
								BP	GO:0006757	ATP generation from ADP	10/483	116/18866	0.000798477	0.0115474
								BP	GO:1905330	regulation of morphogenesis of an epithelium	13/483	181/18866	0.000807977	0.0116425
								BP	GO:0043388	positive regulation of DNA binding	7/483	60/18866	0.000825529	0.0118525
								BP	GO:0045005	DNA-dependent DNA replication maintenance of fidelity	6/483	44/18866	0.00084418	0.0120766
								BP	GO:2001252	positive regulation of chromosome organization	13/483	182/18866	0.000850357	0.0121214
								BP	GO:0002758	innate immune response-activating signal transduction	10/483	117/18866	0.000853585	0.012124
								BP	GO:1902751	positive regulation of cell cycle G2/M phase transition	5/483	30/18866	0.000904253	0.0127979
								BP	GO:1904356	regulation of telomere maintenance via telomere lengthening	7/483	61/18866	0.000912332	0.0128665
								BP	GO:0050000	chromosome localization	8/483	79/18866	0.000925296	0.0129574
								BP	GO:0051303	establishment of chromosome localization	8/483	79/18866	0.000925296	0.0129574
								BP	GO:0046112	nucleobase biosynthetic process	4/483	18/18866	0.000975911	0.0135706
								BP	GO:1904872	regulation of telomerase RNA localization to Cajal body	4/483	18/18866	0.000975911	0.0135706
								BP	GO:0019884	antigen processing and presentation of exogenous antigen	13/483	185/18866	0.000988851	0.0137027
								BP	GO:0032204	regulation of telomere maintenance	8/483	80/18866	0.00100555	0.0138461
								BP	GO:0045143	homologous chromosome segregation	7/483	62/18866	0.00100617	0.0138461
								BP	GO:0009394	2'-deoxyribonucleotide metabolic process	5/483	31/18866	0.00105572	0.014478
								BP	GO:0006220	pyrimidine nucleotide metabolic process	6/483	46/18866	0.00107295	0.0146637
								BP	GO:0010833	telomere maintenance via telomere lengthening	8/483	81/18866	0.00109127	0.0148122
								BP	GO:0071158	positive regulation of cell cycle arrest	8/483	81/18866	0.00109127	0.0148122
								BP	GO:0031571	mitotic G1 DNA damage checkpoint	7/483	63/18866	0.00110743	0.0149804
								BP	GO:0042180	cellular ketone metabolic process	16/483	260/18866	0.00114007	0.0153697
								BP	GO:0043687	post-translational protein modification	20/483	363/18866	0.0011574	0.0155506
								BP	GO:0016925	protein sumoylation	8/483	82/18866	0.00118273	0.0158107
								BP	GO:1903829	positive regulation of cellular protein localization	19/483	338/18866	0.00120776	0.0158107
								BP	GO:0009219	pyrimidine deoxyribonucleotide metabolic process	4/483	19/18866	0.00121134	0.0158107
								BP	GO:0090670	RNA localization to Cajal body	4/483	19/18866	0.00121134	0.0158107
								BP	GO:0090671	telomerase RNA localization to Cajal body	4/483	19/18866	0.00121134	0.0158107
								BP	GO:0090672	telomerase RNA localization	4/483	19/18866	0.00121134	0.0158107
								BP	GO:0090685	RNA localization to nucleus	4/483	19/18866	0.00121134	0.0158107
								BP	GO:0046434	organophosphate catabolic process	11/483	144/18866	0.00121621	0.0158107
								BP	GO:0044783	G1 DNA damage checkpoint	7/483	64/18866	0.00121651	0.0158107
								BP	GO:0044819	mitotic G1/S transition checkpoint	7/483	64/18866	0.00121651	0.0158107
								BP	GO:0000079	regulation of cyclin-dependent protein serine/threonine kinase activity	9/483	102/18866	0.00122344	0.0158204
								BP	GO:0044818	mitotic G2/M transition checkpoint	5/483	32/18866	0.00122522	0.0158204
								BP	GO:0001736	establishment of planar polarity	10/483	124/18866	0.00133323	0.0170021
								BP	GO:0007164	establishment of tissue polarity	10/483	124/18866	0.00133323	0.0170021
								BP	GO:0046031	ADP metabolic process	10/483	124/18866	0.00133323	0.0170021
								BP	GO:0090307	mitotic spindle assembly	7/483	65/18866	0.00133383	0.0170021
								BP	GO:0090150	establishment of protein localization to membrane	19/483	342/18866	0.00138407	0.0175861
								BP	GO:0070482	response to oxygen levels	21/483	396/18866	0.00141657	0.0178881
								BP	GO:0034605	cellular response to heat	10/483	125/18866	0.00141683	0.0178881
								BP	GO:0006144	purine nucleobase metabolic process	4/483	20/18866	0.0014838	0.0186154
								BP	GO:0009264	deoxyribonucleotide catabolic process	4/483	20/18866	0.0014838	0.0186154
								BP	GO:0042398	cellular modified amino acid biosynthetic process	6/483	49/18866	0.00150176	0.0187241
								BP	GO:0006790	sulfur compound metabolic process	20/483	371/18866	0.00150188	0.0187241
								BP	GO:0048002	antigen processing and presentation of peptide antigen	13/483	194/18866	0.00152225	0.0189187
								BP	GO:0042255	ribosome assembly	7/483	67/18866	0.00159488	0.0197597
								BP	GO:1904029	regulation of cyclin-dependent protein kinase activity	9/483	106/18866	0.00160392	0.0198099
								BP	GO:0008608	attachment of spindle microtubules to kinetochore	5/483	34/18866	0.00162339	0.0199883
								BP	GO:0006188	IMP biosynthetic process	3/483	10/18866	0.00174982	0.0212815
								BP	GO:0033314	mitotic DNA replication checkpoint	3/483	10/18866	0.00174982	0.0212815
								BP	GO:0034085	establishment of sister chromatid cohesion	3/483	10/18866	0.00174982	0.0212815
								BP	GO:1904851	positive regulation of establishment of protein localization to telomere	3/483	10/18866	0.00174982	0.0212815
								BP	GO:0051099	positive regulation of binding	12/483	174/18866	0.00179129	0.0215815
								BP	GO:0006123	mitochondrial electron transport, cytochrome c to oxygen	4/483	21/18866	0.0017962	0.0215815
								BP	GO:0019646	aerobic electron transport chain	4/483	21/18866	0.0017962	0.0215815
								BP	GO:0042276	error-prone translesion synthesis	4/483	21/18866	0.0017962	0.0215815
								BP	GO:0032206	positive regulation of telomere maintenance	6/483	51/18866	0.00185278	0.0220839
								BP	GO:0048146	positive regulation of fibroblast proliferation	6/483	51/18866	0.00185278	0.0220839
								BP	GO:0006739	NADP metabolic process	5/483	35/18866	0.00185467	0.0220839
								BP	GO:0007004	telomere maintenance via telomerase	7/483	69/18866	0.00189406	0.0224856
								BP	GO:0016052	carbohydrate catabolic process	13/483	200/18866	0.00199611	0.0236266
								BP	GO:0006301	postreplication repair	6/483	52/18866	0.00204999	0.0241923
								BP	GO:0006289	nucleotide-excision repair	9/483	110/18866	0.00207396	0.0244028
								BP	GO:0006007	glucose catabolic process	5/483	36/18866	0.00210916	0.0245986
								BP	GO:0031572	G2 DNA damage checkpoint	5/483	36/18866	0.00210916	0.0245986
								BP	GO:0051973	positive regulation of telomerase activity	5/483	36/18866	0.00210916	0.0245986
								BP	GO:0002833	positive regulation of response to biotic stimulus	15/483	251/18866	0.00213901	0.0248725
								BP	GO:0032069	regulation of nuclease activity	4/483	22/18866	0.0021514	0.0248725
								BP	GO:0070987	error-free translesion synthesis	4/483	22/18866	0.0021514	0.0248725
								BP	GO:0006165	nucleoside diphosphate phosphorylation	10/483	133/18866	0.00225077	0.0259323
								BP	GO:0000731	DNA synthesis involved in DNA repair	6/483	53/18866	0.00226264	0.0259323
								BP	GO:0032210	regulation of telomere maintenance via telomerase	6/483	53/18866	0.00226264	0.0259323
								BP	GO:0030901	midbrain development	8/483	91/18866	0.00231086	0.0264089
								BP	GO:0032060	bleb assembly	3/483	11/18866	0.0023605	0.0265189
								BP	GO:0045899	positive regulation of RNA polymerase II transcription preinitiation complex assembly	3/483	11/18866	0.0023605	0.0265189
								BP	GO:0046950	cellular ketone body metabolic process	3/483	11/18866	0.0023605	0.0265189
								BP	GO:0070203	regulation of establishment of protein localization to telomere	3/483	11/18866	0.0023605	0.0265189
								BP	GO:1904869	regulation of protein localization to Cajal body	3/483	11/18866	0.0023605	0.0265189
								BP	GO:1904871	positive regulation of protein localization to Cajal body	3/483	11/18866	0.0023605	0.0265189
								BP	GO:0006296	nucleotide-excision repair, DNA incision, 5'-to lesion	5/483	37/18866	0.00238819	0.0266046
								BP	GO:0009167	purine ribonucleoside monophosphate metabolic process	5/483	37/18866	0.00238819	0.0266046
								BP	GO:0060260	regulation of transcription initiation from RNA polymerase II promoter	5/483	37/18866	0.00238819	0.0266046
								BP	GO:0046939	nucleotide phosphorylation	10/483	135/18866	0.00251125	0.0278973
								BP	GO:0006541	glutamine metabolic process	4/483	23/18866	0.00255223	0.0280393
								BP	GO:0042451	purine nucleoside biosynthetic process	4/483	23/18866	0.00255223	0.0280393
								BP	GO:0042455	ribonucleoside biosynthetic process	4/483	23/18866	0.00255223	0.0280393
								BP	GO:0046129	purine ribonucleoside biosynthetic process	4/483	23/18866	0.00255223	0.0280393
								BP	GO:1902806	regulation of cell cycle G1/S phase transition	13/483	206/18866	0.00258545	0.028326
								BP	GO:0072401	signal transduction involved in DNA integrity checkpoint	7/483	73/18866	0.0026214	0.0285625
								BP	GO:0072422	signal transduction involved in DNA damage checkpoint	7/483	73/18866	0.0026214	0.0285625
								BP	GO:0009135	purine nucleoside diphosphate metabolic process	10/483	136/18866	0.00265025	0.0287195
								BP	GO:0009179	purine ribonucleoside diphosphate metabolic process	10/483	136/18866	0.00265025	0.0287195
								BP	GO:0006298	mismatch repair	5/483	38/18866	0.0026931	0.0290257
								BP	GO:0097064	ncRNA export from nucleus	5/483	38/18866	0.0026931	0.0290257
								BP	GO:0016579	protein deubiquitination	16/483	283/18866	0.00270062	0.029028
								BP	GO:0019882	antigen processing and presentation	14/483	232/18866	0.00271602	0.0291148
								BP	GO:0007131	reciprocal meiotic recombination	6/483	55/18866	0.0027373	0.0292641
								BP	GO:0022618	ribonucleoprotein complex assembly	14/483	233/18866	0.002824	0.0301101
								BP	GO:0072395	signal transduction involved in cell cycle checkpoint	7/483	74/18866	0.00283287	0.0301239
								BP	GO:0090090	negative regulation of canonical Wnt signaling pathway	12/483	184/18866	0.00284942	0.0302191
								BP	GO:2000045	regulation of G1/S transition of mitotic cell cycle	12/483	185/18866	0.00297848	0.0312531
								BP	GO:0006977	DNA damage response, signal transduction by p53 class mediator resulting in cell cycle arrest	6/483	56/18866	0.00300084	0.0312531
								BP	GO:0035825	homologous recombination	6/483	56/18866	0.00300084	0.0312531
								BP	GO:0007095	mitotic G2 DNA damage checkpoint	4/483	24/18866	0.00300147	0.0312531
								BP	GO:1904666	regulation of ubiquitin protein ligase activity	4/483	24/18866	0.00300147	0.0312531
								BP	GO:0033683	nucleotide-excision repair, DNA incision	5/483	39/18866	0.00302524	0.0312531
								BP	GO:0000956	nuclear-transcribed mRNA catabolic process	13/483	210/18866	0.00305231	0.0312531
								BP	GO:0000209	protein polyubiquitination	18/483	340/18866	0.00307435	0.0312531
								BP	GO:0007077	mitotic nuclear envelope disassembly	3/483	12/18866	0.00308788	0.0312531
								BP	GO:0034086	maintenance of sister chromatid cohesion	3/483	12/18866	0.00308788	0.0312531
								BP	GO:0034088	maintenance of mitotic sister chromatid cohesion	3/483	12/18866	0.00308788	0.0312531
								BP	GO:0070202	regulation of establishment of protein localization to chromosome	3/483	12/18866	0.00308788	0.0312531
								BP	GO:1902224	ketone body metabolic process	3/483	12/18866	0.00308788	0.0312531
								BP	GO:1903405	protein localization to nuclear body	3/483	12/18866	0.00308788	0.0312531
								BP	GO:1904816	positive regulation of protein localization to chromosome, telomeric region	3/483	12/18866	0.00308788	0.0312531
								BP	GO:1904867	protein localization to Cajal body	3/483	12/18866	0.00308788	0.0312531
								BP	GO:2000105	positive regulation of DNA-dependent DNA replication	3/483	12/18866	0.00308788	0.0312531
								BP	GO:0043467	regulation of generation of precursor metabolites and energy	11/483	162/18866	0.00308837	0.0312531
								BP	GO:0009185	ribonucleoside diphosphate metabolic process	10/483	139/18866	0.00310457	0.0313372
								BP	GO:0072431	signal transduction involved in mitotic G1 DNA damage checkpoint	6/483	57/18866	0.00328287	0.0329696
								BP	GO:1902400	intracellular signal transduction involved in G1 DNA damage checkpoint	6/483	57/18866	0.00328287	0.0329696
								BP	GO:0006278	RNA-dependent DNA biosynthetic process	7/483	76/18866	0.0032948	0.0330061
								BP	GO:0000096	sulfur amino acid metabolic process	5/483	40/18866	0.00338593	0.0338338
								BP	GO:1990823	response to leukemia inhibitory factor	8/483	97/18866	0.00344218	0.034174
								BP	GO:1990830	cellular response to leukemia inhibitory factor	8/483	97/18866	0.00344218	0.034174
								BP	GO:0045089	positive regulation of innate immune response	13/483	213/18866	0.00344576	0.034174
								BP	GO:0010565	regulation of cellular ketone metabolic process	12/483	189/18866	0.00354295	0.0350505
								BP	GO:0007566	embryo implantation	6/483	58/18866	0.00358418	0.0352979
								BP	GO:0006006	glucose metabolic process	13/483	214/18866	0.00358571	0.0352979
								BP	GO:0071826	ribonucleoprotein complex subunit organization	14/483	240/18866	0.00368277	0.0361639
								BP	GO:0009408	response to heat	11/483	166/18866	0.00372108	0.0364501
								BP	GO:0000184	nuclear-transcribed mRNA catabolic process, nonsense-mediated decay	9/483	120/18866	0.00373683	0.0365144
								BP	GO:0006734	NADH metabolic process	5/483	41/18866	0.00377653	0.0367219
								BP	GO:0072528	pyrimidine-containing compound biosynthetic process	5/483	41/18866	0.00377653	0.0367219
								BP	GO:0072413	signal transduction involved in mitotic cell cycle checkpoint	6/483	59/18866	0.00390555	0.0375622
								BP	GO:1902402	signal transduction involved in mitotic DNA damage checkpoint	6/483	59/18866	0.00390555	0.0375622
								BP	GO:1902403	signal transduction involved in mitotic DNA integrity checkpoint	6/483	59/18866	0.00390555	0.0375622
								BP	GO:0009223	pyrimidine deoxyribonucleotide catabolic process	3/483	13/18866	0.00393851	0.0375622
								BP	GO:0009265	2'-deoxyribonucleotide biosynthetic process	3/483	13/18866	0.00393851	0.0375622
								BP	GO:0046040	IMP metabolic process	3/483	13/18866	0.00393851	0.0375622
								BP	GO:0046385	deoxyribose phosphate biosynthetic process	3/483	13/18866	0.00393851	0.0375622
								BP	GO:0099638	endosome to plasma membrane protein transport	3/483	13/18866	0.00393851	0.0375622
								BP	GO:0010212	response to ionizing radiation	10/483	144/18866	0.00399775	0.038036
								BP	GO:0060828	regulation of canonical Wnt signaling pathway	16/483	295/18866	0.00404886	0.038315
								BP	GO:0007064	mitotic sister chromatid cohesion	4/483	26/18866	0.00405597	0.038315
								BP	GO:0051123	RNA polymerase II preinitiation complex assembly	4/483	26/18866	0.00405597	0.038315
								BP	GO:1900034	regulation of cellular response to heat	7/483	79/18866	0.00409272	0.0385705
								BP	GO:0046364	monosaccharide biosynthetic process	8/483	100/18866	0.0041487	0.0390056
								BP	GO:0019985	translesion synthesis	5/483	42/18866	0.00419836	0.0391966
								BP	GO:1901658	glycosyl compound catabolic process	5/483	42/18866	0.00419836	0.0391966
								BP	GO:0001738	morphogenesis of a polarized epithelium	10/483	145/18866	0.00419858	0.0391966
								BP	GO:1902808	positive regulation of cell cycle G1/S phase transition	6/483	60/18866	0.00424778	0.039563
								BP	GO:1900182	positive regulation of protein localization to nucleus	7/483	80/18866	0.00438875	0.0407805
								BP	GO:0031124	mRNA 3'-end processing	8/483	101/18866	0.00440744	0.0408588
								BP	GO:0002831	regulation of response to biotic stimulus	20/483	409/18866	0.00456757	0.0422447
								BP	GO:0042278	purine nucleoside metabolic process	6/483	61/18866	0.00461165	0.0425534
								BP	GO:0007584	response to nutrient	11/483	171/18866	0.00465328	0.0428382
								BP	GO:1902175	regulation of oxidative stress-induced intrinsic apoptotic signaling pathway	4/483	27/18866	0.00466647	0.0428604
								BP	GO:0070646	protein modification by small protein removal	16/483	300/18866	0.00475371	0.0435611
								BP	GO:1903578	regulation of ATP metabolic process	9/483	125/18866	0.00488892	0.0444539
								BP	GO:0006244	pyrimidine nucleotide catabolic process	3/483	14/18866	0.00491821	0.0444539
								BP	GO:0046037	GMP metabolic process	3/483	14/18866	0.00491821	0.0444539
								BP	GO:1901070	guanosine-containing compound biosynthetic process	3/483	14/18866	0.00491821	0.0444539
								BP	GO:1904814	regulation of protein localization to chromosome, telomeric region	3/483	14/18866	0.00491821	0.0444539
								BP	GO:1990173	protein localization to nucleoplasm	3/483	14/18866	0.00491821	0.0444539
								BP	GO:0006760	folic acid-containing compound metabolic process	4/483	28/18866	0.00533581	0.048119
								BP	GO:0034504	protein localization to nucleus	15/483	277/18866	0.00536859	0.0482474
								BP	GO:0048145	regulation of fibroblast proliferation	7/483	83/18866	0.0053743	0.0482474
								BP	GO:0017038	protein import	12/483	200/18866	0.00555047	0.0497167
								BP	GO:0006614	SRP-dependent cotranslational protein targeting to membrane	8/483	105/18866	0.00556847	0.0497261
								BP	GO:0035567	non-canonical Wnt signaling pathway	10/483	151/18866	0.00557652	0.0497261
								CC	GO:0098687	chromosomal region	41/486	350/19559	1.43544e-16	6.38773e-14
								CC	GO:0000775	chromosome, centromeric region	28/486	196/19559	7.54754e-14	1.67933e-11
								CC	GO:0000793	condensed chromosome	29/486	222/19559	2.80376e-13	4.15891e-11
								CC	GO:0000779	condensed chromosome, centromeric region	21/486	122/19559	2.6267e-12	2.92221e-10
								CC	GO:0005657	replication fork	16/486	71/19559	1.50637e-11	1.34067e-09
								CC	GO:0000776	kinetochore	21/486	137/19559	2.62463e-11	1.9466e-09
								CC	GO:0000777	condensed chromosome kinetochore	17/486	106/19559	1.01273e-09	6.43806e-08
								CC	GO:0043596	nuclear replication fork	11/486	41/19559	3.21018e-09	1.63325e-07
								CC	GO:0005819	spindle	31/486	367/19559	3.30321e-09	1.63325e-07
								CC	GO:0005759	mitochondrial matrix	35/486	473/19559	1.00442e-08	4.46967e-07
								CC	GO:0031983	vesicle lumen	28/486	328/19559	1.53478e-08	6.20887e-07
								CC	GO:0034774	secretory granule lumen	27/486	322/19559	4.04106e-08	1.49856e-06
								CC	GO:0060205	cytoplasmic vesicle lumen	27/486	326/19559	5.21751e-08	1.78599e-06
								CC	GO:0030894	replisome	8/486	26/19559	1.44589e-07	4.59586e-06
								CC	GO:0000502	proteasome complex	11/486	63/19559	3.82128e-07	1.13365e-05
								CC	GO:0101002	ficolin-1-rich granule	15/486	124/19559	4.57105e-07	1.19654e-05
								CC	GO:1904813	ficolin-1-rich granule lumen	15/486	124/19559	4.57105e-07	1.19654e-05
								CC	GO:0098798	mitochondrial protein complex	22/486	265/19559	8.69452e-07	2.14948e-05
								CC	GO:1905369	endopeptidase complex	11/486	69/19559	9.8962e-07	2.31779e-05
								CC	GO:0043601	nuclear replisome	7/486	24/19559	1.34358e-06	2.98947e-05
								CC	GO:1905368	peptidase complex	12/486	92/19559	2.89611e-06	6.13699e-05
								CC	GO:0005743	mitochondrial inner membrane	30/486	489/19559	5.71861e-06	0.000115672
								CC	GO:0042555	MCM complex	5/486	12/19559	6.3617e-06	0.000123085
								CC	GO:0098803	respiratory chain complex	11/486	85/19559	8.09855e-06	0.000150161
								CC	GO:0000940	condensed chromosome outer kinetochore	5/486	14/19559	1.54312e-05	0.000274675
								CC	GO:0070069	cytochrome complex	7/486	34/19559	1.68402e-05	0.000288227
								CC	GO:1990204	oxidoreductase complex	12/486	110/19559	1.87536e-05	0.000309087
								CC	GO:0070469	respirasome	11/486	101/19559	4.22434e-05	0.000671368
								CC	GO:0000781	chromosome, telomeric region	14/486	164/19559	6.25677e-05	0.00096009
								CC	GO:0005689	U12-type spliceosomal complex	6/486	29/19559	6.66635e-05	0.000988841
								CC	GO:0044391	ribosomal subunit	15/486	187/19559	7.06573e-05	0.000999459
								CC	GO:0005746	mitochondrial respirasome	10/486	89/19559	7.18712e-05	0.000999459
								CC	GO:0000307	cyclin-dependent protein kinase holoenzyme complex	7/486	43/19559	8.31648e-05	0.00112147
								CC	GO:0035578	azurophil granule lumen	10/486	91/19559	8.69133e-05	0.00113754
								CC	GO:0005839	proteasome core complex	5/486	20/19559	0.000105625	0.00134294
								CC	GO:0005838	proteasome regulatory particle	5/486	21/19559	0.000135815	0.00167882
								CC	GO:0015934	large ribosomal subunit	11/486	116/19559	0.00014971	0.00180057
								CC	GO:0008540	proteasome regulatory particle, base subcomplex	4/486	12/19559	0.000159047	0.00181476
								CC	GO:0034709	methylosome	4/486	12/19559	0.000159047	0.00181476
								CC	GO:0042575	DNA polymerase complex	5/486	22/19559	0.000172191	0.00188462
								CC	GO:0098800	inner mitochondrial membrane protein complex	12/486	138/19559	0.00017364	0.00188462
								CC	GO:0032993	protein-DNA complex	15/486	205/19559	0.000196779	0.00208492
								CC	GO:0022624	proteasome accessory complex	5/486	24/19559	0.000266757	0.002728
								CC	GO:0000784	nuclear chromosome, telomeric region	11/486	124/19559	0.000269735	0.002728
								CC	GO:0005750	mitochondrial respiratory chain complex III	4/486	14/19559	0.000309154	0.0029271
								CC	GO:0045239	tricarboxylic acid cycle enzyme complex	4/486	14/19559	0.000309154	0.0029271
								CC	GO:0045275	respiratory chain complex III	4/486	14/19559	0.000309154	0.0029271
								CC	GO:0005681	spliceosomal complex	14/486	192/19559	0.0003299	0.00305845
								CC	GO:0005840	ribosome	17/486	270/19559	0.000449621	0.0040833
								CC	GO:0005874	microtubule	23/486	431/19559	0.000527418	0.00469402
								CC	GO:0022625	cytosolic large ribosomal subunit	7/486	58/19559	0.000563296	0.00491503
								CC	GO:0000778	condensed nuclear chromosome kinetochore	4/486	17/19559	0.000692795	0.00592873
								CC	GO:0000922	spindle pole	12/486	165/19559	0.000882816	0.00741232
								CC	GO:0090734	site of DNA damage	8/486	82/19559	0.000978038	0.00805976
								CC	GO:0000780	condensed nuclear chromosome, centromeric region	5/486	32/19559	0.00107322	0.00868331
								CC	GO:0005720	nuclear heterochromatin	5/486	34/19559	0.00142374	0.0113136
								CC	GO:0022626	cytosolic ribosome	9/486	110/19559	0.00169538	0.0128943
								CC	GO:0061695	transferase complex, transferring phosphorus-containing groups	15/486	253/19559	0.00173755	0.0128943
								CC	GO:0005766	primary lysosome	11/486	155/19559	0.00173856	0.0128943
								CC	GO:0042582	azurophil granule	11/486	155/19559	0.00173856	0.0128943
								CC	GO:0005832	chaperonin-containing T-complex	3/486	11/19559	0.00216798	0.0155605
								CC	GO:0019774	proteasome core complex, beta-subunit complex	3/486	11/19559	0.00216798	0.0155605
								CC	GO:0008023	transcription elongation factor complex	6/486	56/19559	0.00258974	0.0182926
								CC	GO:0000792	heterochromatin	7/486	78/19559	0.00323845	0.0225173
								CC	GO:0005687	U4 snRNP	3/486	13/19559	0.00362133	0.0247922
								CC	GO:0046540	U4/U6 x U5 tri-snRNP complex	5/486	43/19559	0.00410288	0.0276634
								CC	GO:0043240	Fanconi anaemia nuclear complex	3/486	14/19559	0.00452466	0.0296853
								CC	GO:0097526	spliceosomal tri-snRNP complex	5/486	44/19559	0.00453619	0.0296853
								CC	GO:0005643	nuclear pore	7/486	85/19559	0.00521999	0.0336652
								CC	GO:0001673	male germ cell nucleus	3/486	15/19559	0.00555249	0.0348008
								CC	GO:0005662	DNA replication factor A complex	3/486	15/19559	0.00555249	0.0348008
								CC	GO:0071013	catalytic step 2 spliceosome	7/486	87/19559	0.00592501	0.0366198
								CC	GO:0072686	mitotic spindle	9/486	133/19559	0.00604304	0.0368377
								CC	GO:1902554	serine/threonine protein kinase complex	7/486	89/19559	0.00669881	0.0402834
								CC	GO:0031970	organelle envelope lumen	7/486	90/19559	0.00711272	0.0422021
								CC	GO:0005844	polysome	6/486	69/19559	0.00730441	0.0427692
								CC	GO:0042788	polysomal ribosome	4/486	32/19559	0.00780357	0.0447317
								CC	GO:0071005	U2-type precatalytic spliceosome	5/486	50/19559	0.00784061	0.0447317
								MF	GO:0008094	DNA-dependent ATPase activity	18/474	108/18352	3.10494e-10	1.98406e-07
								MF	GO:0016887	ATPase activity	34/474	423/18352	5.24541e-09	1.1317e-06
								MF	GO:0140097	catalytic activity, acting on DNA	23/474	209/18352	5.31313e-09	1.1317e-06
								MF	GO:0003678	DNA helicase activity	14/474	78/18352	1.0973e-08	1.75294e-06
								MF	GO:0051082	unfolded protein binding	15/474	118/18352	3.85253e-07	4.92354e-05
								MF	GO:0003684	damaged DNA binding	11/474	65/18352	7.7307e-07	8.01046e-05
								MF	GO:0004386	helicase activity	17/474	160/18352	8.77515e-07	8.01046e-05
								MF	GO:0000217	DNA secondary structure binding	8/474	34/18352	1.87746e-06	0.000149962
								MF	GO:0044389	ubiquitin-like protein ligase binding	24/474	316/18352	2.64998e-06	0.000188149
								MF	GO:0009055	electron transfer activity	13/474	111/18352	5.80104e-06	0.000370687
								MF	GO:0003697	single-stranded DNA binding	13/474	114/18352	7.80301e-06	0.000453284
								MF	GO:0016829	lyase activity	17/474	189/18352	8.61958e-06	0.000458993
								MF	GO:0031625	ubiquitin protein ligase binding	22/474	297/18352	1.02581e-05	0.000504225
								MF	GO:0017116	single-stranded DNA helicase activity	5/474	18/18352	7.29899e-05	0.00333147
								MF	GO:0043138	3'-5' DNA helicase activity	5/474	19/18352	9.69638e-05	0.00413066
								MF	GO:0004298	threonine-type endopeptidase activity	5/474	21/18352	0.000162595	0.00649365
								MF	GO:0003688	DNA replication origin binding	5/474	23/18352	0.000257644	0.0096844
								MF	GO:0042393	histone binding	16/474	238/18352	0.00048476	0.017209
								MF	GO:0000287	magnesium ion binding	15/474	217/18352	0.000539963	0.0181598
								MF	GO:0035173	histone kinase activity	4/474	17/18352	0.000800357	0.0255714
								MF	GO:0008301	DNA binding, bending	4/474	18/18352	0.00100818	0.0306774
								MF	GO:0070003	threonine-type peptidase activity	5/474	31/18352	0.0010976	0.0318802
								MF	GO:0070182	DNA polymerase binding	4/474	20/18352	0.00153232	0.0425718
								MF	GO:0016538	cyclin-dependent protein serine/threonine kinase regulator activity	6/474	50/18352	0.00174551	0.0458644
								MF	GO:0016679	oxidoreductase activity, acting on diphenols and related substances as donors	3/474	10/18352	0.00179438	0.0458644
								KEGG	hsa03030	DNA replication	7/49	36/8087	1.40335e-09	1.57175e-07
								KEGG	hsa04110	Cell cycle	9/49	124/8087	4.28898e-08	2.40183e-06
								KEGG	hsa03460	Fanconi anemia pathway	4/49	54/8087	0.000301146	0.0103926
								KEGG	hsa00240	Pyrimidine metabolism	4/49	57/8087	0.000371163	0.0103926
								KEGG	hsa00983	Drug metabolism - other enzymes	4/49	80/8087	0.00134191	0.0300587
								KEGG	hsa00260	Glycine, serine and threonine metabolism	3/49	40/8087	0.00176443	0.032936
								KEGG	hsa04218	Cellular senescence	5/49	156/8087	0.0024098	0.0385569
								KEGG	hsa04914	Progesterone-mediated oocyte maturation	4/49	100/8087	0.00304506	0.0426308
